# Supplementary material for: A Comparative Structural Bioinformatics Analysis of the Insulin Receptor Family Ectodomain Based on Phylogenetic Information
Source: PubMed Central journal article supplement (PMC2577065; doi:10.1371/journal.pone.0003667), 2008-11-07
Supplement: pone.0003667.s001.pdf [file pone.0003667.s001.pdf]

# Supplemental data for the ML analyses

## A) ProtTest model selection for the three sets of Vertebrate IR homologues.

### 1) Model selection for the IGF1R set of orthologues.

```

*****
Best model according to AIC: JTT+G
*****
Model          deltaAIC*   AIC          AICw         -lnL
-----
JTT+G          0.00         18858.28     0.73         -9391.14
JTT+I+G       2.01         18860.28     0.27         -9391.14
WAG+G         145.41       19003.69     0.00         -9463.85
WAG+I+G       147.42       19005.70     0.00         -9463.85
JTT+I         191.61       19049.89     0.00         -9486.94
Dayhoff+G     237.47       19095.75     0.00         -9509.87
Dayhoff+I+G  239.47       19097.75     0.00         -9509.88
WAG+I         313.48       19171.76     0.00         -9547.88
Blosum62+G   384.49       19242.77     0.00         -9583.39
Blosum62+I+G 386.50       19244.78     0.00         -9583.39
VT+G          393.59       19251.87     0.00         -9587.94
VT+I+G       395.60       19253.88     0.00         -9587.94
Dayhoff+I    429.91       19288.19     0.00         -9606.09
JTT           472.33       19330.61     0.00         -9628.31
Blosum62+I   560.18       19418.46     0.00         -9671.23
WAG           578.90       19437.18     0.00         -9681.59
VT+I         645.22       19503.50     0.00         -9713.75
Dayhoff      727.97       19586.25     0.00         -9756.13
Blosum62     816.85       19675.13     0.00         -9800.57
VT           950.02       19808.30     0.00         -9867.15
-----
*: models sorted according to this column
-----

*****
Relative importance of parameters
*****
alpha (+G):    0.73
p-inv (+I):    0.00
alpha+p-inv (+I+G): 0.27
freqs (+F):    0.00

*****
Model-averaged estimate of parameters
*****
alpha (+G):    0.69
p-inv (+I):    0.30
alpha (+I+G):  0.69
p-inv (+I+G):  0.00

-----
Table: Weights(Ranking) of the candidate models under the different frameworks
-----
model          AIC          AICc-1       AICc-2       AICc-3       BIC-1       BIC-2       BIC-3
-----
JTT+G          0.73(1)      0.75(1)      0.77(1)      0.74(1)      0.97(1)      0.95(1)      0.98(1)
JTT+I+G       0.27(2)      0.25(2)      0.23(2)      0.26(2)      0.03(2)      0.05(2)      0.02(2)
WAG+G         0.00(3)      0.00(3)      0.00(3)      0.00(3)      0.00(3)      0.00(3)      0.00(3)
WAG+I+G       0.00(4)      0.00(4)      0.00(4)      0.00(4)      0.00(4)      0.00(4)      0.00(4)
JTT+I         0.00(5)      0.00(5)      0.00(5)      0.00(5)      0.00(5)      0.00(5)      0.00(5)
Dayhoff+G     0.00(6)      0.00(6)      0.00(6)      0.00(6)      0.00(6)      0.00(6)      0.00(6)
Dayhoff+I+G  0.00(7)      0.00(7)      0.00(7)      0.00(7)      0.00(7)      0.00(7)      0.00(7)
WAG+I         0.00(8)      0.00(8)      0.00(8)      0.00(8)      0.00(8)      0.00(8)      0.00(8)
Blosum62+G   0.00(9)      0.00(9)      0.00(9)      0.00(9)      0.00(9)      0.00(9)      0.00(9)
Blosum62+I+G 0.00(10)     0.00(10)     0.00(10)     0.00(10)     0.00(10)     0.00(10)     0.00(10)
VT+G         0.00(11)     0.00(11)     0.00(11)     0.00(11)     0.00(11)     0.00(11)     0.00(11)
VT+I+G       0.00(12)     0.00(12)     0.00(12)     0.00(12)     0.00(12)     0.00(12)     0.00(12)
Dayhoff+I    0.00(13)     0.00(13)     0.00(13)     0.00(13)     0.00(13)     0.00(13)     0.00(13)
JTT           0.00(14)     0.00(14)     0.00(14)     0.00(14)     0.00(14)     0.00(14)     0.00(14)
Blosum62+I   0.00(15)     0.00(15)     0.00(15)     0.00(15)     0.00(15)     0.00(15)     0.00(15)
WAG           0.00(16)     0.00(16)     0.00(16)     0.00(16)     0.00(16)     0.00(16)     0.00(16)
VT+I         0.00(17)     0.00(17)     0.00(17)     0.00(17)     0.00(17)     0.00(17)     0.00(17)
Dayhoff      0.00(18)     0.00(18)     0.00(18)     0.00(18)     0.00(18)     0.00(18)     0.00(18)
Blosum62     0.00(19)     0.00(19)     0.00(19)     0.00(19)     0.00(19)     0.00(19)     0.00(19)
VT           0.00(20)     0.00(20)     0.00(20)     0.00(20)     0.00(20)     0.00(20)     0.00(20)
-----
Relative importance of
parameters
AIC          AICc-1       AICc-2       AICc-3       BIC-1       BIC-2       BIC-3
-----
+G          0.73         0.75         0.77         0.74         0.97         0.95         0.98
+I          0.00         0.00         0.00         0.00         0.00         0.00         0.00
+I+G       0.27         0.25         0.23         0.26         0.03         0.05         0.02
+F         0.00         0.00         0.00         0.00         0.00         0.00         0.00
-----
Model-averaged estimate of
parameters
AIC          AICc-1       AICc-2       AICc-3       BIC-1       BIC-2       BIC-3
-----
alpha (+G)  0.69         0.69         0.69         0.69         0.69         0.69         0.69
p-inv (+I)  0.30         0.30         0.30         0.30         0.30         0.30         0.30
alpha (+I+G) 0.69         0.69         0.69         0.69         0.69         0.69         0.69
p-inv (+I+G) 0.00         0.00         0.00         0.00         0.00         0.00         0.00
-----
AIC : Akaike Information Criterion framework.
AICc-x: Second-Order Akaike framework.
BIC-x : Bayesian Information Criterion framework.
AICc/BIC-1: sample size as: number of sites in the alignment (946.0)
AICc/BIC-2: sample size as: Sum of position's Shannon Entropy over the whole alignment (441.7)
AICc/BIC-3: sample size as: align. length x num sequences x averaged (0-1)Sh. Entropy (2043.8)

```

## 2) Model selection for the IR set of orthologues.

```

*****
Best model according to AIC: JTT+G
*****
Model      deltaAIC*   AIC      AICw     -lnL
-----
JTT+G      0.00        21501.00  0.72     -10712.50
JTT+I+G    1.87        21502.88  0.28     -10712.44
WAG+G      163.79      21664.79  0.00     -10794.40
WAG+I+G    165.40      21666.40  0.00     -10794.20
Dayhoff+G  228.00      21729.00  0.00     -10826.50
Dayhoff+I+G 229.96     21730.96  0.00     -10826.48
JTT+I      302.29      21803.29  0.00     -10863.65
VT+G       439.22      21940.22  0.00     -10932.11
VT+I+G     441.22      21942.22  0.00     -10932.11
WAG+I      449.45      21950.45  0.00     -10937.23
Blosum62+G 455.08      21956.09  0.00     -10940.04
Blosum62+I+G 456.89     21957.90  0.00     -10939.95
Dayhoff+I  559.59      22060.59  0.00     -10992.30
Blosum62+I 728.09      22229.10  0.00     -11076.55
JTT        771.96      22272.96  0.00     -11099.48
VT+I       814.43      22315.44  0.00     -11119.72
WAG        896.02      22397.03  0.00     -11161.51
Dayhoff    1032.70     22533.70  0.00     -11229.85
Blosum62  1175.88     22676.88  0.00     -11301.44
VT        1301.25     22802.26  0.00     -11364.13
-----

```

\*: models sorted according to this column

```

*****
Relative importance of parameters
*****
alpha (+G): 0.72
p-inv (+I): 0.00
alpha+p-inv (+I+G): 0.28
freqs (+F): 0.00

```

```

*****
Model-averaged estimate of parameters
*****
alpha (+G): 0.57
p-inv (+I): 0.33
alpha (+I+G): 0.60
p-inv (+I+G): 0.02

```

Table: Weights(Ranking) of the candidate models under the different frameworks

| model        | AIC            | AICc-1         | AICc-2         | AICc-3         | BIC-1          | BIC-2          | BIC-3          |
|--------------|----------------|----------------|----------------|----------------|----------------|----------------|----------------|
| <b>JTT+G</b> | <b>0.72(1)</b> | <b>0.74(1)</b> | <b>0.75(1)</b> | <b>0.73(1)</b> | <b>0.97(1)</b> | <b>0.95(1)</b> | <b>0.98(1)</b> |
| JTT+I+G      | 0.28(2)        | 0.26(2)        | 0.25(2)        | 0.27(2)        | 0.03(2)        | 0.05(2)        | 0.02(2)        |
| WAG+G        | 0.00(3)        | 0.00(3)        | 0.00(3)        | 0.00(3)        | 0.00(3)        | 0.00(3)        | 0.00(3)        |
| WAG+I+G      | 0.00(4)        | 0.00(4)        | 0.00(4)        | 0.00(4)        | 0.00(4)        | 0.00(4)        | 0.00(4)        |
| Dayhoff+G    | 0.00(5)        | 0.00(5)        | 0.00(5)        | 0.00(5)        | 0.00(5)        | 0.00(5)        | 0.00(5)        |
| Dayhoff+I+G  | 0.00(6)        | 0.00(6)        | 0.00(6)        | 0.00(6)        | 0.00(6)        | 0.00(6)        | 0.00(6)        |
| JTT+I        | 0.00(7)        | 0.00(7)        | 0.00(7)        | 0.00(7)        | 0.00(7)        | 0.00(7)        | 0.00(7)        |
| VT+G         | 0.00(8)        | 0.00(8)        | 0.00(8)        | 0.00(8)        | 0.00(8)        | 0.00(8)        | 0.00(8)        |
| VT+I+G       | 0.00(9)        | 0.00(9)        | 0.00(9)        | 0.00(9)        | 0.00(9)        | 0.00(9)        | 0.00(9)        |
| WAG+I        | 0.00(10)       | 0.00(10)       | 0.00(10)       | 0.00(10)       | 0.00(10)       | 0.00(10)       | 0.00(10)       |
| Blosum62+G   | 0.00(11)       | 0.00(11)       | 0.00(11)       | 0.00(11)       | 0.00(11)       | 0.00(11)       | 0.00(11)       |
| Blosum62+I+G | 0.00(12)       | 0.00(12)       | 0.00(12)       | 0.00(12)       | 0.00(12)       | 0.00(12)       | 0.00(12)       |
| Dayhoff+I    | 0.00(13)       | 0.00(13)       | 0.00(13)       | 0.00(13)       | 0.00(13)       | 0.00(13)       | 0.00(13)       |
| Blosum62+I   | 0.00(14)       | 0.00(14)       | 0.00(14)       | 0.00(14)       | 0.00(14)       | 0.00(14)       | 0.00(14)       |
| JTT          | 0.00(15)       | 0.00(15)       | 0.00(15)       | 0.00(15)       | 0.00(15)       | 0.00(15)       | 0.00(15)       |
| VT+I         | 0.00(16)       | 0.00(16)       | 0.00(16)       | 0.00(16)       | 0.00(16)       | 0.00(16)       | 0.00(16)       |
| WAG          | 0.00(17)       | 0.00(17)       | 0.00(17)       | 0.00(17)       | 0.00(17)       | 0.00(17)       | 0.00(17)       |
| Dayhoff      | 0.00(18)       | 0.00(18)       | 0.00(18)       | 0.00(18)       | 0.00(18)       | 0.00(18)       | 0.00(18)       |
| Blosum62     | 0.00(19)       | 0.00(19)       | 0.00(19)       | 0.00(19)       | 0.00(19)       | 0.00(19)       | 0.00(19)       |
| VT           | 0.00(20)       | 0.00(20)       | 0.00(20)       | 0.00(20)       | 0.00(20)       | 0.00(20)       | 0.00(20)       |

```

Relative importance of
parameters
+G      0.72      0.74      0.75      0.73      0.97      0.95      0.98
+I      0.00      0.00      0.00      0.00      0.00      0.00      0.00
+I+G    0.28      0.26      0.25      0.27      0.03      0.05      0.02
+F      0.00      0.00      0.00      0.00      0.00      0.00      0.00

```

```

Model-averaged estimate of
parameters
alpha (+G) 0.57      0.57      0.57      0.57      0.57      0.57      0.57
p-inv (+I) 0.33      0.33      0.33      0.33      0.33      0.33      0.33
alpha (+I+G) 0.60      0.60      0.60      0.60      0.60      0.60      0.60
p-inv (+I+G) 0.02      0.02      0.02      0.02      0.02      0.02      0.02

```

AIC : Akaike Information Criterion framework.

AICc-x: Second-Order Akaike framework.

BIC-x : Bayesian Information Criterion framework.

AICc/BIC-1: sample size as: number of sites in the alignment (946.0)

AICc/BIC-2: sample size as: Sum of position's Shannon Entropy over the whole alignment (490.4)

AICc/BIC-3: sample size as: align. length x num sequences x averaged (0-1)Sh. Entropy (2269.5)

### 3) Model selection for the IRR set of orthologues.

\*\*\*\*\*  
**Best model according to AIC: JTT+G**  
 \*\*\*\*\*

| Model        | deltaAIC* | AIC      | AICw        | -lnL     |
|--------------|-----------|----------|-------------|----------|
| JTT+G        | 0.00      | 14108.65 | <b>0.73</b> | -7026.33 |
| JTT+I+G      | 2.00      | 14110.65 | 0.27        | -7026.33 |
| JTT+I        | 109.39    | 14218.05 | 0.00        | -7081.02 |
| WAG+G        | 186.18    | 14294.84 | 0.00        | -7119.42 |
| WAG+I+G      | 188.18    | 14296.84 | 0.00        | -7119.42 |
| Dayhoff+G    | 218.53    | 14327.18 | 0.00        | -7135.59 |
| Dayhoff+I+G  | 220.53    | 14329.18 | 0.00        | -7135.59 |
| WAG+I        | 309.21    | 14417.86 | 0.00        | -7180.93 |
| JTT          | 345.54    | 14454.19 | 0.00        | -7200.09 |
| Dayhoff+I    | 345.69    | 14454.35 | 0.00        | -7199.17 |
| VT+G         | 401.38    | 14510.03 | 0.00        | -7227.01 |
| VT+I+G       | 403.38    | 14512.03 | 0.00        | -7227.01 |
| Blosum62+G   | 422.83    | 14531.48 | 0.00        | -7237.74 |
| Blosum62+I+G | 424.83    | 14533.48 | 0.00        | -7237.74 |
| WAG          | 538.72    | 14647.37 | 0.00        | -7296.69 |
| VT+I         | 542.73    | 14651.38 | 0.00        | -7297.69 |
| Blosum62+I   | 545.11    | 14653.77 | 0.00        | -7298.88 |
| Dayhoff      | 604.66    | 14713.32 | 0.00        | -7329.66 |
| Blosum62     | 767.41    | 14876.06 | 0.00        | -7411.03 |
| VT           | 796.95    | 14905.61 | 0.00        | -7425.80 |

-----  
 \*: models sorted according to this column  
 -----

\*\*\*\*\*  
 Relative importance of parameters  
 \*\*\*\*\*

**alpha (+G): 0.73**  
 p-inv (+I): 0.00  
 alpha+p-inv (+I+G): 0.27  
 freqs (+F): 0.00

\*\*\*\*\*  
 Model-averaged estimate of parameters  
 \*\*\*\*\*

alpha (+G): 0.51  
 p-inv (+I): 0.42  
 alpha (+I+G): 0.51  
 p-inv (+I+G): 0.00

-----  
 Table: Weights(Ranking) of the candidate models under the different frameworks  
 -----

| model        | AIC            | AICc-1         | AICc-2         | AICc-3         | BIC-1          | BIC-2          | BIC-3          |
|--------------|----------------|----------------|----------------|----------------|----------------|----------------|----------------|
| <b>JTT+G</b> | <b>0.73(1)</b> | <b>0.74(1)</b> | <b>0.77(1)</b> | <b>0.74(1)</b> | <b>0.97(1)</b> | <b>0.95(1)</b> | <b>0.97(1)</b> |
| JTT+I+G      | 0.27(2)        | 0.26(2)        | 0.23(2)        | 0.26(2)        | 0.03(2)        | 0.05(2)        | 0.03(2)        |
| JTT+I        | 0.00(3)        | 0.00(3)        | 0.00(3)        | 0.00(3)        | 0.00(3)        | 0.00(3)        | 0.00(3)        |
| WAG+G        | 0.00(4)        | 0.00(4)        | 0.00(4)        | 0.00(4)        | 0.00(4)        | 0.00(4)        | 0.00(4)        |
| WAG+I+G      | 0.00(5)        | 0.00(5)        | 0.00(5)        | 0.00(5)        | 0.00(5)        | 0.00(5)        | 0.00(5)        |
| Dayhoff+G    | 0.00(6)        | 0.00(6)        | 0.00(6)        | 0.00(6)        | 0.00(6)        | 0.00(6)        | 0.00(6)        |
| Dayhoff+I+G  | 0.00(7)        | 0.00(7)        | 0.00(7)        | 0.00(7)        | 0.00(7)        | 0.00(7)        | 0.00(7)        |
| WAG+I        | 0.00(8)        | 0.00(8)        | 0.00(8)        | 0.00(8)        | 0.00(8)        | 0.00(8)        | 0.00(8)        |
| JTT          | 0.00(9)        | 0.00(9)        | 0.00(9)        | 0.00(9)        | 0.00(9)        | 0.00(9)        | 0.00(9)        |
| Dayhoff+I    | 0.00(10)       | 0.00(10)       | 0.00(10)       | 0.00(10)       | 0.00(10)       | 0.00(10)       | 0.00(10)       |
| VT+G         | 0.00(11)       | 0.00(11)       | 0.00(11)       | 0.00(11)       | 0.00(11)       | 0.00(11)       | 0.00(11)       |
| VT+I+G       | 0.00(12)       | 0.00(12)       | 0.00(12)       | 0.00(12)       | 0.00(12)       | 0.00(12)       | 0.00(12)       |
| Blosum62+G   | 0.00(13)       | 0.00(13)       | 0.00(13)       | 0.00(13)       | 0.00(13)       | 0.00(13)       | 0.00(13)       |
| Blosum62+I+G | 0.00(14)       | 0.00(14)       | 0.00(14)       | 0.00(14)       | 0.00(14)       | 0.00(14)       | 0.00(14)       |
| WAG          | 0.00(15)       | 0.00(15)       | 0.00(15)       | 0.00(15)       | 0.00(15)       | 0.00(15)       | 0.00(15)       |
| VT+I         | 0.00(16)       | 0.00(16)       | 0.00(16)       | 0.00(16)       | 0.00(16)       | 0.00(16)       | 0.00(16)       |
| Blosum62+I   | 0.00(17)       | 0.00(17)       | 0.00(17)       | 0.00(17)       | 0.00(17)       | 0.00(17)       | 0.00(17)       |
| Dayhoff      | 0.00(18)       | 0.00(18)       | 0.00(18)       | 0.00(18)       | 0.00(18)       | 0.00(18)       | 0.00(18)       |
| Blosum62     | 0.00(19)       | 0.00(19)       | 0.00(19)       | 0.00(19)       | 0.00(19)       | 0.00(19)       | 0.00(19)       |
| VT           | 0.00(20)       | 0.00(20)       | 0.00(20)       | 0.00(20)       | 0.00(20)       | 0.00(20)       | 0.00(20)       |

| Relative importance of parameters | AIC         | AICc-1      | AICc-2      | AICc-3      | BIC-1       | BIC-2       | BIC-3       |
|-----------------------------------|-------------|-------------|-------------|-------------|-------------|-------------|-------------|
| <b>+G</b>                         | <b>0.73</b> | <b>0.74</b> | <b>0.77</b> | <b>0.74</b> | <b>0.97</b> | <b>0.95</b> | <b>0.97</b> |
| +I                                | 0.00        | 0.00        | 0.00        | 0.00        | 0.00        | 0.00        | 0.00        |
| +I+G                              | 0.27        | 0.26        | 0.23        | 0.26        | 0.03        | 0.05        | 0.03        |
| +F                                | 0.00        | 0.00        | 0.00        | 0.00        | 0.00        | 0.00        | 0.00        |

| Model-averaged estimate of parameters | AIC  | AICc-1 | AICc-2 | AICc-3 | BIC-1 | BIC-2 | BIC-3 |
|---------------------------------------|------|--------|--------|--------|-------|-------|-------|
| alpha (+G)                            | 0.51 | 0.51   | 0.51   | 0.51   | 0.51  | 0.51  | 0.51  |
| p-inv (+I)                            | 0.42 | 0.42   | 0.42   | 0.42   | 0.42  | 0.42  | 0.42  |
| alpha (+I+G)                          | 0.51 | 0.51   | 0.51   | 0.51   | 0.51  | 0.51  | 0.51  |
| p-inv (+I+G)                          | 0.00 | 0.00   | 0.00   | 0.00   | 0.00  | 0.00  | 0.00  |

-----  
 AIC : Akaike Information Criterion framework.  
 AICc-x: Second-Order Akaike framework.  
 BIC-x : Bayesian Information Criterion framework.  
 AICc/BIC-1: sample size as: number of sites in the alignment (920.0)  
 AICc/BIC-2: sample size as: Sum of position's Shannon Entropy over the whole alignment (295.2)  
 AICc/BIC-3: sample size as: align. length x num sequences x averaged (0-1)Sh. Entropy (1024.5)  
 -----

## B) Tree bipartition support statistics.

Based on the Shimodaira-Hasegawa-like  $P$  values for branch support calculated for each of the trees found in 41 PhyML maximum likelihood searches under JTT+G (40 using random sequential addition seed trees, the remaining one using a BioNJ tree).

| tree_file                          | n_bip. | min     | max | mean    | median  | std_dev  | variance   | %_NRB<br>< 0.7 | %_PRB<br>[ 0.7-0.85] | %_MRB<br>[ .85-.95] | %_WRB<br>[ .95-.99] | %_HRB<br>≥ 0.99 |
|------------------------------------|--------|---------|-----|---------|---------|----------|------------|----------------|----------------------|---------------------|---------------------|-----------------|
| my_IRR_IGF1R_IR_Invert_prof,phy10  | 55     | 0,01    | 1   | 0,82    | 0,94    | 0,26     | 0,0657     | 18,18          | 14,55                | 25,45               | 14,55               | 27,27           |
| my_IRR_IGF1R_IR_Invert_prof,phy11  | 55     | 0,08    | 1   | 0,83    | 0,94    | 0,25     | 0,0635     | 16,36          | 14,55                | 21,82               | 18,18               | 29,09           |
| my_IRR_IGF1R_IR_Invert_prof,phy12  | 55     | 0,21    | 1   | 0,83    | 0,94    | 0,23     | 0,0529     | 21,82          | 9,09                 | 23,64               | 16,36               | 29,09           |
| my_IRR_IGF1R_IR_Invert_prof,phy13  | 55     | 0,1     | 1   | 0,84    | 0,94    | 0,23     | 0,0521     | 16,36          | 16,36                | 18,18               | 20                  | 29,09           |
| my_IRR_IGF1R_IR_Invert_prof,phy14  | 55     | 0,01    | 1   | 0,8     | 0,92    | 0,28     | 0,0797     | 20             | 14,55                | 23,64               | 14,55               | 27,27           |
| my_IRR_IGF1R_IR_Invert_prof,phy15  | 55     | 0,17    | 1   | 0,82    | 0,92    | 0,24     | 0,0561     | 23,64          | 9,09                 | 23,64               | 14,55               | 29,09           |
| my_IRR_IGF1R_IR_Invert_prof,phy16  | 55     | 0,06    | 1   | 0,85    | 0,94    | 0,21     | 0,0423     | 12,73          | 21,82                | 18,18               | 18,18               | 29,09           |
| my_IRR_IGF1R_IR_Invert_prof,phy17  | 55     | 0,01    | 1   | 0,83    | 0,93    | 0,24     | 0,0582     | 18,18          | 18,18                | 18,18               | 18,18               | 27,27           |
| my_IRR_IGF1R_IR_Invert_prof,phy18  | 55     | 0,01    | 1   | 0,83    | 0,93    | 0,23     | 0,0513     | 20             | 18,18                | 16,36               | 20                  | 25,45           |
| my_IRR_IGF1R_IR_Invert_prof,phy19  | 55     | 0,29    | 1   | 0,87    | 0,93    | 0,17     | 0,0279     | 16,36          | 14,55                | 25,45               | 14,55               | 29,09           |
| my_IRR_IGF1R_IR_Invert_prof,phy1   | 55     | 0,01    | 1   | 0,79    | 0,94    | 0,28     | 0,0807     | 25,45          | 12,73                | 18,18               | 14,55               | 29,09           |
| my_IRR_IGF1R_IR_Invert_prof,phy20  | 55     | 0,05    | 1   | 0,82    | 0,94    | 0,25     | 0,0638     | 20             | 14,55                | 16,36               | 18,18               | 30,91           |
| my_IRR_IGF1R_IR_Invert_prof,phy21  | 55     | 0,02    | 1   | 0,84    | 0,93    | 0,23     | 0,0525     | 12,73          | 20                   | 23,64               | 16,36               | 27,27           |
| my_IRR_IGF1R_IR_Invert_prof,phy22  | 55     | 0,26    | 1   | 0,83    | 0,93    | 0,21     | 0,0422     | 23,64          | 14,55                | 20                  | 14,55               | 27,27           |
| my_IRR_IGF1R_IR_Invert_prof,phy23  | 55     | 0       | 1   | 0,81    | 0,94    | 0,27     | 0,0713     | 20             | 14,55                | 20                  | 18,18               | 27,27           |
| my_IRR_IGF1R_IR_Invert_prof,phy24  | 55     | 0,01    | 1   | 0,81    | 0,93    | 0,28     | 0,0796     | 18,18          | 10,91                | 29,09               | 16,36               | 25,45           |
| my_IRR_IGF1R_IR_Invert_prof,phy25  | 55     | 0,01    | 1   | 0,81    | 0,94    | 0,27     | 0,071      | 20             | 12,73                | 20                  | 16,36               | 30,91           |
| my_IRR_IGF1R_IR_Invert_prof,phy26  | 55     | 0,02    | 1   | 0,81    | 0,93    | 0,26     | 0,069      | 23,64          | 12,73                | 20                  | 18,18               | 25,45           |
| my_IRR_IGF1R_IR_Invert_prof,phy27  | 55     | 0,01    | 1   | 0,81    | 0,93    | 0,25     | 0,0618     | 18,18          | 21,82                | 20                  | 12,73               | 27,27           |
| my_IRR_IGF1R_IR_Invert_prof,phy28  | 55     | 0       | 1   | 0,83    | 0,93    | 0,25     | 0,0606     | 16,36          | 16,36                | 21,82               | 18,18               | 27,27           |
| my_IRR_IGF1R_IR_Invert_prof,phy29  | 55     | 0       | 1   | 0,84    | 0,93    | 0,24     | 0,056      | 12,73          | 21,82                | 20                  | 18,18               | 27,27           |
| my_IRR_IGF1R_IR_Invert_prof,phy2   | 55     | 0,01    | 1   | 0,79    | 0,93    | 0,29     | 0,0852     | 21,82          | 12,73                | 21,82               | 18,18               | 25,45           |
| my_IRR_IGF1R_IR_Invert_prof,phy30  | 55     | 0,01    | 1   | 0,8     | 0,94    | 0,28     | 0,0756     | 23,64          | 12,73                | 20                  | 18,18               | 25,45           |
| my_IRR_IGF1R_IR_Invert_prof,phy31  | 55     | 0,01    | 1   | 0,82    | 0,93    | 0,25     | 0,0632     | 18,18          | 14,55                | 23,64               | 16,36               | 27,27           |
| my_IRR_IGF1R_IR_Invert_prof,phy32  | 55     | 0,02    | 1   | 0,81    | 0,94    | 0,27     | 0,0723     | 23,64          | 10,91                | 20                  | 18,18               | 27,27           |
| my_IRR_IGF1R_IR_Invert_prof,phy33  | 55     | 0,01    | 1   | 0,8     | 0,94    | 0,31     | 0,0936     | 20             | 14,55                | 18,18               | 18,18               | 29,09           |
| my_IRR_IGF1R_IR_Invert_prof,phy34  | 55     | 0,01    | 1   | 0,79    | 0,93    | 0,29     | 0,0843     | 23,64          | 14,55                | 21,82               | 12,73               | 27,27           |
| my_IRR_IGF1R_IR_Invert_prof,phy35  | 55     | 0,12    | 1   | 0,83    | 0,94    | 0,23     | 0,0521     | 21,82          | 10,91                | 20                  | 18,18               | 29,09           |
| my_IRR_IGF1R_IR_Invert_prof,phy36  | 55     | 0       | 1   | 0,8     | 0,93    | 0,28     | 0,0778     | 21,82          | 12,73                | 23,64               | 12,73               | 29,09           |
| my_IRR_IGF1R_IR_Invert_prof,phy37  | 55     | 0,01    | 1   | 0,79    | 0,94    | 0,29     | 0,0859     | 21,82          | 16,36                | 21,82               | 14,55               | 25,45           |
| my_IRR_IGF1R_IR_Invert_prof,phy38  | 55     | 0,02    | 1   | 0,82    | 0,93    | 0,25     | 0,0612     | 20             | 12,73                | 25,45               | 14,55               | 27,27           |
| my_IRR_IGF1R_IR_Invert_prof,phy39  | 55     | 0,03    | 1   | 0,78    | 0,93    | 0,29     | 0,0851     | 25,45          | 9,09                 | 23,64               | 14,55               | 27,27           |
| my_IRR_IGF1R_IR_Invert_prof,phy3   | 55     | 0,01    | 1   | 0,82    | 0,93    | 0,25     | 0,0645     | 20             | 10,91                | 25,45               | 16,36               | 27,27           |
| my_IRR_IGF1R_IR_Invert_prof,phy40  | 55     | 0,01    | 1   | 0,82    | 0,94    | 0,25     | 0,0613     | 16,36          | 23,64                | 16,36               | 14,55               | 29,09           |
| my_IRR_IGF1R_IR_Invert_prof,phy4   | 55     | 0,17    | 1   | 0,82    | 0,94    | 0,25     | 0,0602     | 20             | 10,91                | 21,82               | 20                  | 27,27           |
| my_IRR_IGF1R_IR_Invert_prof,phy5   | 55     | 0,04    | 1   | 0,83    | 0,94    | 0,23     | 0,0507     | 18,18          | 20                   | 18,18               | 16,36               | 27,27           |
| my_IRR_IGF1R_IR_Invert_prof,phy6   | 55     | 0       | 1   | 0,81    | 0,94    | 0,28     | 0,0757     | 21,82          | 10,91                | 25,45               | 16,36               | 25,45           |
| my_IRR_IGF1R_IR_Invert_prof,phy7   | 55     | 0,02    | 1   | 0,78    | 0,93    | 0,3      | 0,0911     | 25,45          | 9,09                 | 21,82               | 18,18               | 25,45           |
| my_IRR_IGF1R_IR_Invert_prof,phy8   | 55     | 0,12    | 1   | 0,85    | 0,93    | 0,22     | 0,0503     | 14,55          | 14,55                | 25,45               | 16,36               | 29,09           |
| my_IRR_IGF1R_IR_Invert_prof,phy9   | 55     | 0,01    | 1   | 0,8     | 0,94    | 0,28     | 0,0807     | 23,64          | 12,73                | 20                  | 14,55               | 29,09           |
| my_IRR_IGF1R_IR_Invert_prof,phy_NJ | 55     | 0       | 1   | 0,79    | 0,93    | 0,3      | 0,0925     | 21,82          | 10,91                | 21,82               | 16,36               | 29,09           |
|                                    | mean   | 0,04804 | 1   | 0,81634 | 0,93414 | 0,256585 | 0,06637804 | 19,955853      | 14,36975             | 21,463170           | 16,496585           | 27,713902       |
|                                    | median | 0,01    | 1   | 0,82    | 0,93    | 0,25     | 0,0638     | 20             | 14,55                | 21,82               | 16,36               | 27,27           |

The data indicate a good overall tree resolution, with a mean median support value of 0.93, calculated over the 41 trees. Forty four percent of the cumulative 2255 bipartitions in the sample had a significant support value ( $P \geq 0.95$ ), and 65% of them had a ( $P \geq 0.85$ ). Notice that means and median values are very similar. The range of model lnL values was: 30836.65814 - 30870.89200, only 34 units of difference. The highest-scoring tree highlighted by shading.

### C) Shimodaira-Hasegawa comparison of 41 user-supplied PhyML trees.

Fourty of them used random sequential addition seed trees and the remaining one a (default) BioNJ starter phylogeny. All were run with PhyML 2.4.5 under the best-approximating JTT+G model.

Analysis performed with Puzzle 5.2 [3] using the randomly chosen tree #6 for model parameter estimation.

| Tree | log L     | difference | S.E.       | p-1sKH   | p-SH     | c-ELW    | 2sKH         |
|------|-----------|------------|------------|----------|----------|----------|--------------|
| 1    | -30920.22 | 19.13      | 28.9019    | 0.2540 + | 0.8270 + | 0.0032 - | +            |
| 2    | -30918.11 | 17.02      | 32.7880    | 0.2980 + | 0.8130 + | 0.0195 + | +            |
| 3    | -30921.04 | 19.95      | 28.6171    | 0.2240 + | 0.7840 + | 0.0049 - | +            |
| 4    | -30909.99 | 8.90       | 18.1504    | 0.3060 + | 0.9380 + | 0.0179 + | +            |
| 5    | -30916.65 | 15.56      | 26.1724    | 0.2780 + | 0.8540 + | 0.0187 + | +            |
| 6    | -30901.09 | 0.00       | <---- best | 1.0000 + | 1.0000 + | 0.1544 + | best         |
| 7    | -30933.54 | 32.46      | 29.8335    | 0.1520 + | 0.5110 + | 0.0000 - | +            |
| 8    | -30918.16 | 17.07      | 31.9574    | 0.2930 + | 0.8390 + | 0.0090 + | +            |
| 9    | -30921.24 | 20.15      | 21.7312    | 0.1810 + | 0.7080 + | 0.0326 + | +            |
| 10   | -30911.82 | 10.73      | 23.0560    | 0.3120 + | 0.8600 + | 0.0621 + | +            |
| 11   | -30926.76 | 25.67      | 32.6045    | 0.2020 + | 0.6290 + | 0.0089 + | +            |
| 12   | -30928.11 | 27.02      | 31.5468    | 0.2130 + | 0.6390 + | 0.0042 - | +            |
| 13   | -30925.87 | 24.78      | 30.1233    | 0.2080 + | 0.6750 + | 0.0076 + | +            |
| 14   | -30918.64 | 17.55      | 28.5998    | 0.2500 + | 0.8370 + | 0.0160 + | +            |
| 15   | -30915.19 | 14.11      | 27.9301    | 0.3000 + | 0.8820 + | 0.0120 + | rdm tree#15  |
| 16   | -30928.55 | 27.46      | 29.0529    | 0.1750 + | 0.5880 + | 0.0183 + | +            |
| 17   | -30910.53 | 9.45       | 19.1169    | 0.3160 + | 0.9290 + | 0.0271 + | +            |
| 18   | -30923.15 | 22.06      | 29.9950    | 0.2360 + | 0.7320 + | 0.0083 + | +            |
| 19   | -30922.78 | 21.69      | 28.0707    | 0.2340 + | 0.7210 + | 0.0204 + | +            |
| 20   | -30927.55 | 26.46      | 31.0046    | 0.1940 + | 0.6410 + | 0.0084 + | +            |
| 21   | -30905.19 | 4.10       | 22.8222    | 0.4290 + | 0.9470 + | 0.1050 + | +            |
| 22   | -30913.79 | 12.70      | 22.0795    | 0.2720 + | 0.8750 + | 0.0129 + | +            |
| 23   | -30910.28 | 9.19       | 19.0054    | 0.2990 + | 0.9390 + | 0.0187 + | +            |
| 24   | -30922.79 | 21.70      | 29.3545    | 0.2400 + | 0.7660 + | 0.0036 - | +            |
| 25   | -30922.89 | 21.81      | 31.2019    | 0.2660 + | 0.7270 + | 0.0087 + | +            |
| 26   | -30930.51 | 29.42      | 32.5653    | 0.1780 + | 0.5560 + | 0.0054 - | +            |
| 27   | -30916.59 | 15.50      | 28.0001    | 0.2800 + | 0.8600 + | 0.0069 - | +            |
| 28   | -30912.32 | 11.23      | 16.7926    | 0.2360 + | 0.9110 + | 0.0065 - | +            |
| 29   | -30925.54 | 24.45      | 22.9266    | 0.1330 + | 0.6980 + | 0.0026 - | +            |
| 30   | -30925.80 | 24.71      | 23.5154    | 0.1600 + | 0.7310 + | 0.0012 - | +            |
| 31   | -30918.39 | 17.30      | 29.2052    | 0.2850 + | 0.8420 + | 0.0113 + | +            |
| 32   | -30917.78 | 16.69      | 27.6657    | 0.2900 + | 0.8420 + | 0.0116 + | +            |
| 33   | -30913.84 | 12.75      | 27.6496    | 0.3250 + | 0.9200 + | 0.0167 + | +            |
| 34   | -30907.55 | 6.46       | 21.4700    | 0.3640 + | 0.9500 + | 0.0450 + | +            |
| 35   | -30918.02 | 16.93      | 30.6274    | 0.2670 + | 0.8320 + | 0.0123 + | +            |
| 36   | -30911.59 | 10.50      | 23.7767    | 0.3380 + | 0.8860 + | 0.0444 + | +            |
| 37   | -30910.64 | 9.55       | 28.3319    | 0.3550 + | 0.8650 + | 0.0840 + | +            |
| 38   | -30925.24 | 24.15      | 29.6290    | 0.2140 + | 0.6880 + | 0.0047 - | +            |
| 39   | -30911.88 | 10.79      | 26.1383    | 0.3220 + | 0.8780 + | 0.0620 + | +            |
| 40   | -30924.83 | 23.74      | 35.7654    | 0.2460 + | 0.6610 + | 0.0144 + | +            |
| 41   | -30909.60 | 8.51       | 20.2645    | 0.3250 + | 0.8920 + | 0.0685 + | + BioNJ tree |

The columns show the results and p-values of the following tests:

- 1sKH** - one sided KH test based on pairwise SH tests
- SH** - Shimodaira-Hasegawa test (1999) [2]
- ELW** - Expected Likelihood Weight (Strimmer-Rambaut 2002)[4]
- 2sKH** - two sided Kishino-Hasegawa test (1989)[1].

Plus signs denote the confidence sets. Minus signs denote significant exclusion. All tests used 5% significance level. 1sKH, SH, and ELW performed 1000 resamplings using the REL method.

1sKH and 2sKH are correct to the 2nd position after the the decimal point of the log-likelihoods.

As shown by the table above, all competing trees were congruent when evaluated by the very conservative Shimodaira-Hasegawa test. However, the more stringent expected likelihood weights test uncovered 11 significantly incongruent topologies. The lnL scores of the best tree (sarted from random seed tree #15) and that one found starting from the defual BioNJ tree are not significantly different.

## D) PhyML tree search statistics.

D1) Sorted log likelihood scores for the ML trees obtained for each individual tree search initiated from a random tree (phy\*\_phym1) vs. that obtained for the standard search initiated from a BioNJ tree.

```
-30836.65814 = my_IRR_IGF1R_IR_Invert_prof.phy15_phym1_stat.txt
-30840.27766 = my_IRR_IGF1R_IR_Invert_prof.phy29_phym1_stat.txt
-30841.18697 = my_IRR_IGF1R_IR_Invert_prof.phy40_phym1_stat.txt
-30844.51886 = my_IRR_IGF1R_IR_Invert_prof.phy_MJ_phym1_stat.txt
-30845.52360 = my_IRR_IGF1R_IR_Invert_prof.phy6_phym1_stat.txt
-30845.70280 = my_IRR_IGF1R_IR_Invert_prof.phy13_phym1_stat.txt
-30845.76546 = my_IRR_IGF1R_IR_Invert_prof.phy19_phym1_stat.txt
-30845.88096 = my_IRR_IGF1R_IR_Invert_prof.phy25_phym1_stat.txt
-30845.91526 = my_IRR_IGF1R_IR_Invert_prof.phy30_phym1_stat.txt
-30846.11650 = my_IRR_IGF1R_IR_Invert_prof.phy5_phym1_stat.txt
-30848.04128 = my_IRR_IGF1R_IR_Invert_prof.phy35_phym1_stat.txt
-30848.57785 = my_IRR_IGF1R_IR_Invert_prof.phy2_phym1_stat.txt
-30849.78780 = my_IRR_IGF1R_IR_Invert_prof.phy8_phym1_stat.txt
-30851.61455 = my_IRR_IGF1R_IR_Invert_prof.phy3_phym1_stat.txt
-30852.35625 = my_IRR_IGF1R_IR_Invert_prof.phy14_phym1_stat.txt
-30854.20135 = my_IRR_IGF1R_IR_Invert_prof.phy23_phym1_stat.txt
-30854.57105 = my_IRR_IGF1R_IR_Invert_prof.phy17_phym1_stat.txt
-30854.93661 = my_IRR_IGF1R_IR_Invert_prof.phy34_phym1_stat.txt
-30855.36022 = my_IRR_IGF1R_IR_Invert_prof.phy38_phym1_stat.txt
-30855.83467 = my_IRR_IGF1R_IR_Invert_prof.phy22_phym1_stat.txt
-30856.37565 = my_IRR_IGF1R_IR_Invert_prof.phy39_phym1_stat.txt
-30857.06373 = my_IRR_IGF1R_IR_Invert_prof.phy18_phym1_stat.txt
-30857.07095 = my_IRR_IGF1R_IR_Invert_prof.phy11_phym1_stat.txt
-30857.25147 = my_IRR_IGF1R_IR_Invert_prof.phy10_phym1_stat.txt
-30857.59641 = my_IRR_IGF1R_IR_Invert_prof.phy4_phym1_stat.txt
-30860.00784 = my_IRR_IGF1R_IR_Invert_prof.phy27_phym1_stat.txt
-30860.29513 = my_IRR_IGF1R_IR_Invert_prof.phy31_phym1_stat.txt
-30860.44945 = my_IRR_IGF1R_IR_Invert_prof.phy12_phym1_stat.txt
-30860.49945 = my_IRR_IGF1R_IR_Invert_prof.phy26_phym1_stat.txt
-30861.82375 = my_IRR_IGF1R_IR_Invert_prof.phy21_phym1_stat.txt
-30862.07270 = my_IRR_IGF1R_IR_Invert_prof.phy7_phym1_stat.txt
-30862.30288 = my_IRR_IGF1R_IR_Invert_prof.phy9_phym1_stat.txt
-30862.53409 = my_IRR_IGF1R_IR_Invert_prof.phy37_phym1_stat.txt
-30862.77819 = my_IRR_IGF1R_IR_Invert_prof.phy32_phym1_stat.txt
-30863.40874 = my_IRR_IGF1R_IR_Invert_prof.phy36_phym1_stat.txt
-30864.61757 = my_IRR_IGF1R_IR_Invert_prof.phy24_phym1_stat.txt
-30865.27667 = my_IRR_IGF1R_IR_Invert_prof.phy1_phym1_stat.txt
-30866.44167 = my_IRR_IGF1R_IR_Invert_prof.phy33_phym1_stat.txt
-30866.98699 = my_IRR_IGF1R_IR_Invert_prof.phy28_phym1_stat.txt
-30867.14938 = my_IRR_IGF1R_IR_Invert_prof.phy20_phym1_stat.txt
-30870.89200 = my_IRR_IGF1R_IR_Invert_prof.phy16_phym1_stat.txt
-30836.65814 = 1
-30840.27766 = 1
-30841.18697 = 1
-30844.51886 = 1
-30845.52360 = 1
-30845.70280 = 1
-30845.76546 = 1
-30845.88096 = 1
-30845.91526 = 1
-30846.11650 = 1
-30848.04128 = 1
-30848.57785 = 1
-30849.78780 = 1
-30851.61455 = 1
-30852.35625 = 1
-30854.20135 = 1
-30854.57105 = 1
-30854.93661 = 1
-30855.36022 = 1
-30855.83467 = 1
-30856.37565 = 1
-30857.06373 = 1
-30857.07095 = 1
-30857.25147 = 1
-30857.59641 = 1
-30860.00784 = 1
-30860.29513 = 1
-30860.44945 = 1
-30860.49945 = 1
-30861.82375 = 1
-30862.07270 = 1
-30862.30288 = 1
-30862.53409 = 1
-30862.77819 = 1
-30863.40874 = 1
-30864.61757 = 1
-30865.27667 = 1
-30866.44167 = 1
-30866.98699 = 1
-30867.14938 = 1
-30870.89200 = 1
```

## D2) Frequency of the lnL scores.

These data show that three trees were found that had a better score than that found by the default PhyML search (starting from a BioNJ seed tree), although not significantly better, as shown by the SH and c-ELW tests above. The fact that as many tree islands were found as searches were started indicates it gets stuck in different peaks that are in a narrow height range of lnL scores: -30836.65814 (best) to -30870.89200 (worst).

## References not cited in the paper:

[1] Kishino H, Hasegawa M (1989) Evaluation of the maximum likelihood estimate of the evolutionary tree topologies from DNA sequence data, and the branching order in hominoidea. *J Mol Evol* 29(2): 170-179.

[2] Shimodaira H, Hasegawa M (1999) Multiple comparisons of log-likelihoods with applications to phylogenetic inference. *Mol Biol Evol* 16: 1114-1116.

[3] Schmidt HA, Strimmer K, Vingron M, von Haeseler A (2002) TREE-PUZZLE: maximum likelihood phylogenetic analysis using quartets and parallel computing. *Bioinformatics* 18(3): 502-504.

[4] Strimmer K, Rambaut A (2002) Inferring confidence sets of possibly misspecified gene trees. *Proc Biol Sci* 269(1487): 137-142.
