# Supplementary material for: A Comparative Structural Bioinformatics Analysis of the Insulin Receptor Family Ectodomain Based on Phylogenetic Information
Source: PubMed Central journal article supplement (PMC2577065; doi:10.1371/journal.pone.0003667), 2008-11-07
Supplement: pone.0003667.s002.pdf [file pone.0003667.s002.pdf]

**Bayesian Analysis of the the 55 vertebrate ectodomain sequences listed in Table 1, plus three IR family invertebrate homologous ectodomain sequences.**

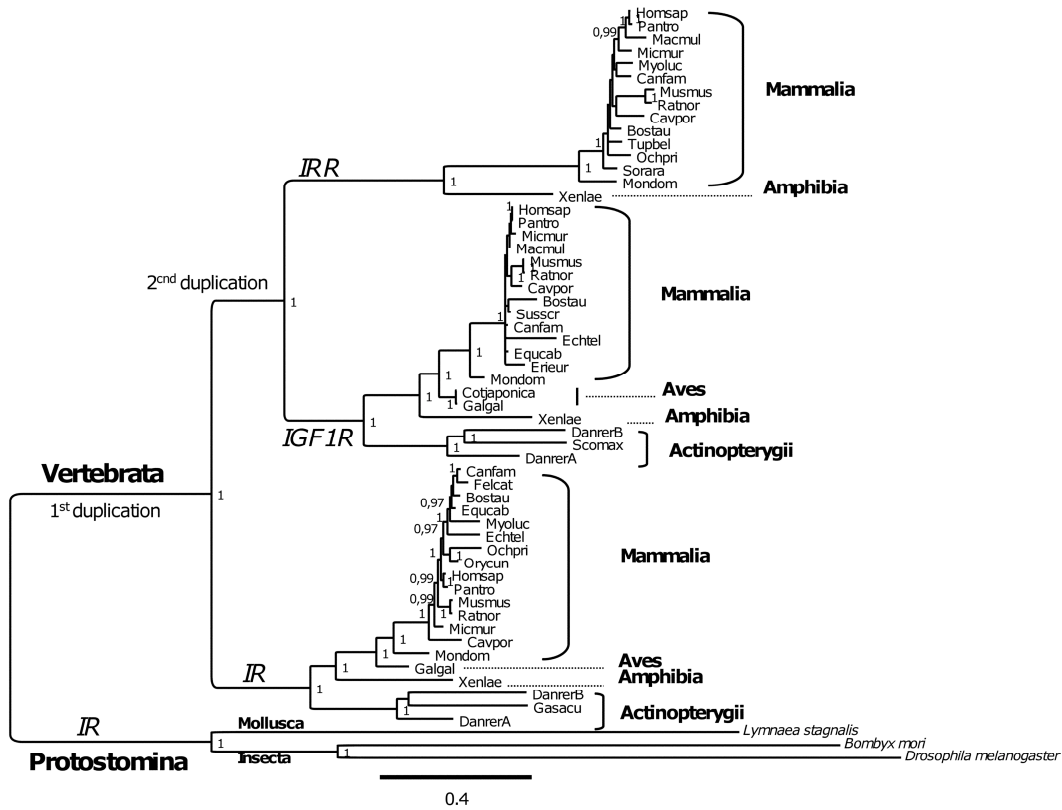

**Figure S1. Bayesian phylogeny of the IR family.**

Bayesian phylogeny of the IR family ectodomain inferred from amino acid sequences. Two independent MC3 runs, each replicated twice, yielded identical topologies, indicating excellent convergence. The numbers at the bipartitions correspond to their posterior probabilities (only shown if  $\geq 0.95$ ), estimated from their proportion of occurrences among 8002 source trees (4001 x 2, after discarding the first 1000 trees of each run as burnin) used to calculate the majority rule consensus tree shown. The scale indicates the number of expected substitutions per site under the best fitting JTT+G model (shape parameter  $\alpha = 0.96$ ), which had a posterior probability of 1. Compare this figure with Fig. 1 in the paper, which shows the corresponding ML phylogeny.

## Statistical analysis of the four Bayesian MC<sup>3</sup> runs.

**Generation plots of lnL values for the four Bayesian MC<sup>3</sup> runs.** Notice the good mixing and convergence of the individual runs

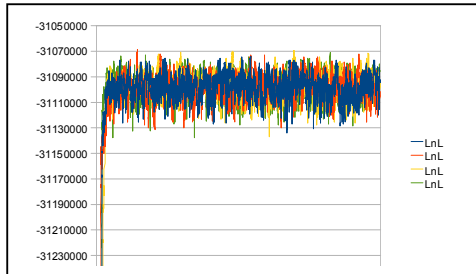

**Generation plots of tree length values for the four Bayesian MC<sup>3</sup> runs.** Notice the good mixing and convergence of the individual runs

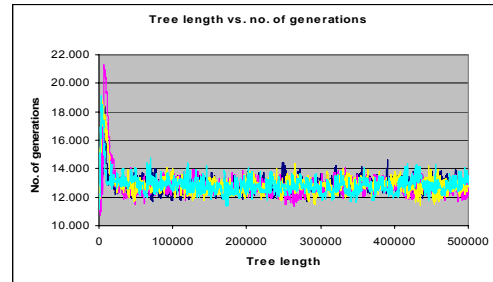

### Estimated marginal likelihoods for replicate 1 and 2 of Run1:

| Rep          | Arithmetic mean  | Harmonic mean    |
|--------------|------------------|------------------|
| 1            | -31078.29        | -31129.18        |
| 2            | -31078.93        | -31123.45        |
| <b>TOTAL</b> | <b>-31078.56</b> | <b>-31128.49</b> |

### Estimated marginal likelihoods for replicate 1 and 2 of Run2:

| Rep          | Arithmetic mean  | Harmonic mean    |
|--------------|------------------|------------------|
| 1            | -31076.18        | -31128.40        |
| 2            | -31080.54        | -31125.36        |
| <b>TOTAL</b> | <b>-31076.86</b> | <b>-31127.75</b> |

### Model parameter summaries over the replicate 1 and 2 of Run1:

Summaries are based on a total of 8002 samples from 2 replicated runs. Each run produced 5001 samples of which 4001 samples were included.

| Parameter | Mean      | Variance | 95% Cred. Interval |           | Median    | PSRF * |
|-----------|-----------|----------|--------------------|-----------|-----------|--------|
|           |           |          | Lower              | Upper     |           |        |
| TL        | 12.766011 | 0.196148 | 11.965000          | 13.689000 | 12.751000 | 1.017  |
| alpha     | 0.960459  | 0.002124 | 0.873029           | 1.053529  | 0.958775  | 1.000  |

\* Convergence diagnostic (PSRF = Potential scale reduction factor [Gelman and Rubin, 1992], uncorrected) should approach 1 as runs converge. The values may be unreliable if you have a small number of samples. PSRF should only be used as a rough guide to convergence since all the assumptions that allow one to interpret it as a scale reduction factor are not met in the phylogenetic context.

### Model parameter summaries over the replicate 1 and 2 of Run2:

Summaries are based on a total of 8002 samples from 2 replicated runs. Each run produced 5001 samples of which 4001 samples were included.

| Parameter | Mean      | Variance | 95% Cred. Interval |           | Median    | PSRF * |
|-----------|-----------|----------|--------------------|-----------|-----------|--------|
|           |           |          | Lower              | Upper     |           |        |
| TL        | 12.726446 | 0.183333 | 11.876000          | 13.535000 | 12.739000 | 1.008  |
| alpha     | 0.962038  | 0.002120 | 0.875532           | 1.054901  | 0.961335  | 1.001  |

\* Convergence diagnostic (PSRF = Potential scale reduction factor [Gelman and Rubin, 1992], uncorrected) should approach 1 as runs converge. The values may be unreliable if you have a small number of samples. PSRF should only be used as a rough guide to convergence since all the assumptions that allow one to interpret it as a scale reduction factor are not met in the phylogenetic context.

**Model selection using reversible jump  
MC<sup>3</sup> replicate 1 and 2 of *Run1*:**

Amino acid model probabilities:

| Model        | Posterior<br>Probability | Standard<br>Deviation |
|--------------|--------------------------|-----------------------|
| Poisson      | 0.000                    | 0.000000              |
| <b>Jones</b> | <b>1.000</b>             | <b>0.000000</b>       |
| Dayhoff      | 0.000                    | 0.000000              |
| Mtrev        | 0.000                    | 0.000000              |
| Mtmam        | 0.000                    | 0.000000              |
| Wag          | 0.000                    | 0.000000              |
| Rtrev        | 0.000                    | 0.000000              |
| Cprev        | 0.000                    | 0.000000              |
| Vt           | 0.000                    | 0.000000              |
| Blosum       | 0.000                    | 0.000000              |

**Model selection using reversible jump  
MC<sup>3</sup> replicate 1 and 2 of *Run2*:**

Amino acid model probabilities:

| Model        | Posterior<br>Probability | Standard<br>Deviation |
|--------------|--------------------------|-----------------------|
| Poisson      | 0.000                    | 0.000000              |
| <b>Jones</b> | <b>1.000</b>             | <b>0.000000</b>       |
| Dayhoff      | 0.000                    | 0.000000              |
| Mtrev        | 0.000                    | 0.000000              |
| Mtmam        | 0.000                    | 0.000000              |
| Wag          | 0.000                    | 0.000000              |
| Rtrev        | 0.000                    | 0.000000              |
| Cprev        | 0.000                    | 0.000000              |
| Vt           | 0.000                    | 0.000000              |
| Blosum       | 0.000                    | 0.000000              |
